# Supplementary material
Source: MDPI journal article supplement (https://www.mdpi.com/2813-0464/3/2/11)
Supplement: s1 [file s1]

Archive with 2 entries (2 files):
- S1 Pilot Study.pdf
- S2 a-sMA detection protocol.pdf
